# Supplementary material for: Exploring MicroRNAs Associated with Pomegranate Pistil Development: An Identification and Analysis Study
Source: MDPI journal article supplement (doi:10.3390/horticulturae10010085), 2024-01-16
Supplement: s1 [file s1]

# Exploring MicroRNAs Associated with Pomegranate Pistil Development: An Identification and Analysis Study

Yujie Zhao <sup>1,2</sup>, Jingyi Huang <sup>3</sup>, Ming Li <sup>1,2</sup>, Hongfang Ren <sup>3</sup>, Jian Jiao <sup>1,2</sup>, Ran Wan <sup>1,2</sup>, Yu Liu <sup>1,2</sup>, Miaomiao Wang <sup>1,2</sup>, Jiangli Shi <sup>1,2</sup>, Kunxi Zhang <sup>1,2</sup>, Pengbo Hao <sup>1,2</sup>, Shangwei Song <sup>1,2</sup>, Tuanhui Bai <sup>1,2</sup> and Xianbo Zheng <sup>1,2,\*</sup>

<sup>1</sup> College of Horticulture, Henan Agricultural University, Zhengzhou 450046, China; z1184985369@163.com (Y.Z.); liya1702@163.com (M.L.); jiaojian@henau.edu.cn (J.J.); wanxayl@henau.edu.cn (R.W.); yuliu@henau.edu.cn (Y.L.); wmm2018@henau.edu.cn (M.W.); sjli30@henau.edu.cn (J.S.); kunxi66@163.com (K.Z.); hao\_pb@henau.edu.cn (P.H.); songshw959@163.com (S.S.); tuanhuibai88@163.com (T.B.)

<sup>2</sup> Henan Province International Joint Laboratory of Horticultural Plant Biology, Henan Agricultural University, Zhengzhou 450046, China

<sup>3</sup> College of Forestry, Nanjing Forestry University, Nanjing 210037, China; 19959932089@163.com (J.H.); 17503482685@163.com (H.R.)

\* Correspondence: xbzhen@henau.edu.cn



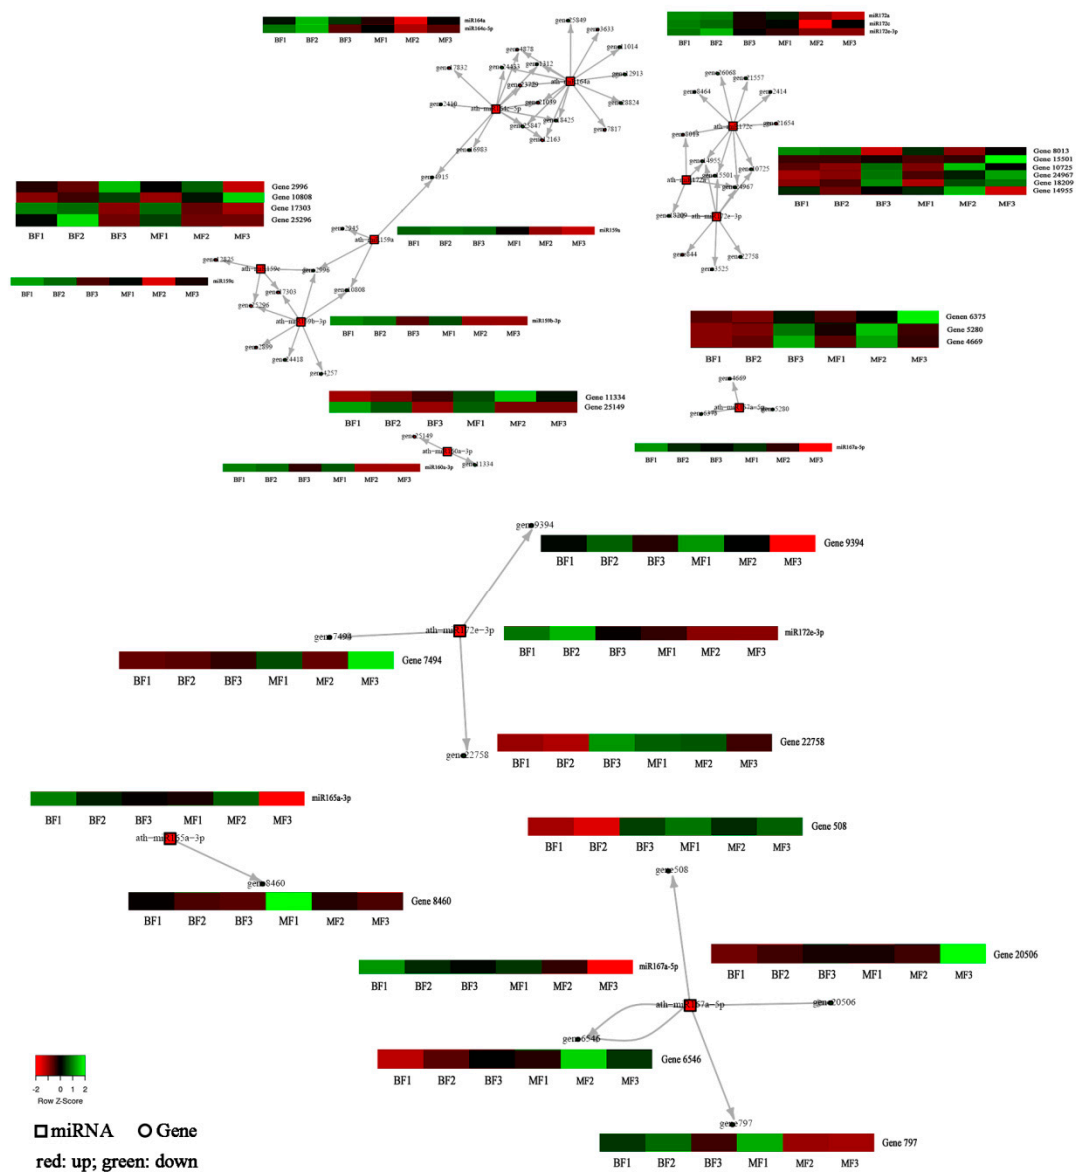

**Supplemental Figure S3. Analysis of the relationship between differentially expressed miRNAs and target genes.**

**Supplemental Table S1. The qRT-PCR primer of miRNAs**

| Primer         | Primer sequence                                                                      |
|----------------|--------------------------------------------------------------------------------------|
| miRNA172e      | F: ctcaactggtgtcgtggagtcggcaattcagttgagatgcagca; R: acactccagctgggggaatcttgatgatg    |
| miRNA160a      | F: ctcaactggtgtcgtggagtcggcaattcagttgagtatgcatg; R: acactccagctggggcgtatgaggagcca    |
| miRNA164c      | F: ctcaactggtgtcgtggagtcggcaattcagttgagcgcacgtg; R: acactccagctgggtggagaagcagggca    |
| miRNA167d      | F: ctcaactggtgtcgtggagtcggcaattcagttgagccagatca; R: acactccagctgggtgaagctgccagcatg   |
| miRNA159a      | F: ctcaactggtgtcgtggagtcggcaattcagttgagtagagctc; R: acactccagctgggtttgattgaaggga     |
| Novel 178      | F: ctcaactggtgtcgtggagtcggcaattcagttgagctgacaac; R: acactccagctgggcgtccccaccaccgatgt |
| Novel 437      | F: ctcaactggtgtcgtggagtcggcaattcagttgaggtgaata; R: acactccagctgggcccagccgcgattgaata  |
| Novel 472      | F: ctcaactggtgtcgtggagtcggcaattcagttgagcagctgtc; R: acactccagctgggaaccaaagaatttaaga  |
| <i>PgActin</i> | F: agtcctcttcagccatctc; R: cactgagcacaatgtttcca                                      |

**Supplemental Table S2. Molecular characteristics of partial Known and Novel miRNAs**

| miRNA family | miRNA        | miRNA mature sequence   | Length (nt) |
|--------------|--------------|-------------------------|-------------|
| miRNA156     | miRNA156a    | UGACAGAAGAGAGUGAGCAC    | 20          |
|              | miRNA156g    | CGACAGAAGAGAGUGAGCAC    | 20          |
|              | miRNA156h    | UGACAGAAGAAAGAGAGCAC    | 20          |
|              | miRNA156i    | UGACAGAAGAGAGAGAGCAG    | 20          |
|              | miRNA156j    | UGACAGAAGAGAGAGAGCAC    | 20          |
| miRNA157     | miRNA157a    | UUGACAGAAGAUAGAGAGCAC   | 21          |
| miRNA159     | miRNA159a    | UUUGGAUUGAAGGGAGCUCUA   | 21          |
|              | miRNA159b    | UUUGGAUUGAAGGGAGCUCUU   | 21          |
|              | miRNA159c    | UUUGGAUUGAAGGGAGCUCCU   | 21          |
| miRNA160     | miRNA160a-3p | GCGUAUGAGGAGCCAUGCAUA   | 21          |
|              | miRNA160a-5p | UGCCUGGCUCCCUGUAUGCCA   | 21          |
| miRNA164     | miRNA164a    | UGGAGAAGCAGGGCACGUGCA   | 21          |
|              | miRNA164c    | UGGAGAAGCAGGGCACGUGCG   | 21          |
| miRNA165     | miRNA165a-3p | UCGGACCAGGCUUCAUCCCCC   | 21          |
|              | miRNA165a-5p | GGAAUGUUGUCUGGAUCGAGG   | 21          |
| miRNA166     | miRNA166a-3p | UCGGACCAGGCUUCAUCCCCC   | 21          |
|              | miRNA166a-5p | GGACUGUUGUCUGGCUCGAGG   | 21          |
| miRNA167     | miRNA167a    | UGAAGCUGCCAGCAUGAUCUA   | 21          |
|              | miRNA167c    | UAAGCUGCCAGCAUGAUCUUG   | 21          |
|              | miRNA167d    | UGAAGCUGCCAGCAUGAUCUGG  | 22          |
| miRNA169     | miRNA169b    | CAGCCAAGGAUGACUUGCCGG   | 21          |
| miRNA172     | miRNA172a    | AGAAUCUUGAUGAUGCUGCAU   | 21          |
|              | miRNA172c    | AGAAUCUUGAUGAUGCUGCAG   | 21          |
|              | miRNA172e    | GGAAUCUUGAUGAUGCUGCAU   | 21          |
| Novel 41     | Novel 41     | AAAGUCUAAUAGAUCUACCUACC | 24          |

|           |           |                           |    |
|-----------|-----------|---------------------------|----|
| Novel 95  | Novel 95  | AUGUCGUGCUAGAACUAAAAAUCU  | 24 |
| Novel 111 | Novel 111 | AAUUUUAAACUCUGAAAUCAAACGC | 24 |
| Novel 178 | Novel 178 | CGUCCCCACCACCGAUGUUGUCAG  | 24 |
| Novel 312 | Novel 312 | GGAAAAUUGAUGUCGUGCUAUGCC  | 24 |
| Novel 391 | Novel 391 | CAGUCGACUGUGUUCAUUUGGUCU  | 24 |
| Novel 437 | Novel 437 | CCGAGCCGCGAUUGAAUAUUCAGC  | 24 |
| Novel 472 | Novel 472 | AACCAAAAGAAUUUAAGACACGUG  | 24 |

**Supplemental Table S3. Information of partial miRNAs' target genes**

| miRNA ID   | Target genes                                                                       |
|------------|------------------------------------------------------------------------------------|
| miR156a-5p | gene11510, gene1341, gene9689, gene2311, gene26316, gene1095, gene2300, gene17534  |
| miR157a-5p | gene9689, gene2300, gene10490, gene1341, gene2311, gene26316, gene1095, gene680    |
| miR159a    | gene1232, gene26786, gene3071, gene18113, gene10479, gene13326, gene6404, gene2996 |
| miR160a    | Gene4313, gene25750, gene4441, gene18010, gene25149, gene5993, gene5388, gene1194  |
| miR164a    | gene2909, gene26387, gene9517, gene3014, gene15484, gene5088, gene4244, gene4105   |
| miR165a-3p | gene8460, gene7528, gene27930, gene712, gene27931, gene13434,                      |
| miR167a-5p | Gene6546, gene508, gene20506, gene797                                              |
| miR172     | gene8013, gene14955, gene15501, gene24967, gene10725                               |
| Novel 41   | gene10099, gene5403                                                                |
| Novel 95   | gene17833                                                                          |
| Novel 111  | gene6798, gene12900, gene10203, gene3421, gene20233, gene5397, gene10767, gene6293 |
| Novel 178  | gene8682                                                                           |
| Novel 312  | gene14490, gene15143, gene7285, gene1302, gene2113                                 |
| Novel 391  | gene18730, gene18730, gene4143, gene5423, gene15200, gene25267, gene5888           |
| Novel 437  | gene24538, gene5094                                                                |
| Novel 472  | gene9921, gene21521, gene10433, gene12016                                          |

Note: miRNA ID represented microRNA names, target genes represented target genes name. Pomegranate gene IDs of target genes were shown in Supplemental Table 4.

**Supplemental Table S4. Pomegranate differential expression genes annotation information**

| gene_id   | log <sub>2</sub> FoldChange | padj        | gene_name       | gene_chr       |
|-----------|-----------------------------|-------------|-----------------|----------------|
| gene24899 | -14.32288543                | 2.23818E-31 | CDL15_Pgr002637 | MTKT01005527.1 |
| gene16721 | -13.51383383                | 2.28501E-27 | CDL15_Pgr021303 | MTKT01003414.1 |
| gene15567 | -13.41755291                | 6.48172E-35 | CDL15_Pgr009570 | MTKT01003224.1 |
| gene13767 | -12.82955243                | 6.69673E-22 | CDL15_Pgr018563 | MTKT01002507.1 |
| gene10570 | -12.67835161                | 1.53948E-59 | CDL15_Pgr007411 | MTKT01002214.1 |
| gene28004 | -12.48115611                | 1.98547E-23 | CDL15_Pgr006152 | MTKT01005880.1 |
| gene20395 | -12.34768302                | 7.91297E-21 | CDL15_Pgr011184 | MTKT01004486.1 |
| novel.719 | -12.23717661                | 2.66753E-13 | -               | MTKT01002214.1 |
| gene26833 | -12.00355036                | 2.53299E-21 | CDL15_Pgr028635 | MTKT01005739.1 |
| gene9970  | -11.81974616                | 7.73085E-20 | CDL15_Pgr006809 | MTKT01002214.1 |
| gene24906 | -11.40974919                | 8.9267E-20  | CDL15_Pgr002644 | MTKT01005527.1 |

|            |              |             |                 |                |
|------------|--------------|-------------|-----------------|----------------|
| gene27420  | -11.20141109 | 1.15588E-19 | CDL15_Pgr010132 | MTKT01005811.1 |
| gene17637  | -11.15940566 | 4.84575E-18 | CDL15_Pgr008580 | MTKT01003794.1 |
| gene4463   | -11.13649438 | 2.53526E-17 | CDL15_Pgr010175 | MTKT01000826.1 |
| gene10293  | -11.1111984  | 1.48023E-34 | CDL15_Pgr007132 | MTKT01002214.1 |
| gene10050  | -11.02103696 | 5.86235E-18 | CDL15_Pgr006889 | MTKT01002214.1 |
| gene8133   | -10.96741686 | 1.00099E-09 | CDL15_Pgr009122 | MTKT01001838.1 |
| gene28270  | -10.96343509 | 1.51175E-96 | CDL15_Pgr026251 | MTKT01005977.1 |
| gene1187   | -10.60911677 | 2.82918E-88 | CDL15_Pgr014750 | MTKT01000548.1 |
| gene18082  | -10.58022993 | 2.71024E-23 | CDL15_Pgr026636 | MTKT01003950.1 |
| gene24876  | -10.5211137  | 1.10037E-08 | CDL15_Pgr002614 | MTKT01005527.1 |
| gene18078  | -10.51964359 | 0           | CDL15_Pgr026632 | MTKT01003950.1 |
| gene26733  | -10.49438525 | 3.29429E-17 | CDL15_Pgr028535 | MTKT01005739.1 |
| gene18529  | -10.23032291 | 1.00101E-07 | CDL15_Pgr001242 | MTKT01003953.1 |
| gene18647  | -10.22521029 | 1.763E-174  | CDL15_Pgr001360 | MTKT01003953.1 |
| gene2909   | -10.20960058 | 2.47568E-13 | CDL15_Pgr002300 | MTKT01000790.1 |
| novel.426  | -10.16414972 | 8.85952E-16 | -               | MTKT01001276.1 |
| gene6124   | -10.0885307  | 6.70896E-16 | CDL15_Pgr029154 | MTKT01001158.1 |
| gene21776  | -10.05046617 | 1.03346E-22 | CDL15_Pgr025831 | MTKT01004810.1 |
| gene17990  | -9.999633037 | 1.04604E-14 | CDL15_Pgr026544 | MTKT01003950.1 |
| gene23267  | -9.971989691 | 6.89384E-83 | CDL15_Pgr024617 | MTKT01004967.1 |
| gene20466  | -9.958598932 | 1.50132E-49 | CDL15_Pgr011255 | MTKT01004486.1 |
| gene1920   | -9.957395608 | 3.3889E-15  | CDL15_Pgr024137 | MTKT01000666.1 |
| gene23429  | -9.920859621 | 7.07256E-30 | CDL15_Pgr004790 | MTKT01005034.1 |
| gene703    | -9.771874912 | 1.92279E-11 | CDL15_Pgr023414 | MTKT01000420.1 |
| gene9882   | -9.761750753 | 8.05057E-14 | CDL15_Pgr006721 | MTKT01002214.1 |
| gene28980  | -9.728083844 | 0.001290915 | CDL15_Pgr020137 | MTKT01006319.1 |
| gene2721   | -9.5082634   | 4.897E-162  | CDL15_Pgr020761 | MTKT01000785.1 |
| gene17246  | -9.46349295  | 3.10353E-12 | CDL15_Pgr003973 | MTKT01003769.1 |
| gene8858   | -9.459925993 | 2.05021E-12 | CDL15_Pgr029194 | MTKT01001946.1 |
| gene24027  | -9.414692507 | 1.88674E-12 | CDL15_Pgr019205 | MTKT01005376.1 |
| gene19998  | -9.404730509 | 1.3061E-30  | CDL15_Pgr005609 | MTKT01004399.1 |
| novel.1876 | -9.392873424 | 1.60781E-12 | -               | MTKT01005880.1 |
| gene1182   | -9.365091318 | 1.93059E-13 | CDL15_Pgr014745 | MTKT01000548.1 |
| gene25197  | -9.362904659 | 1.08103E-15 | CDL15_Pgr013417 | MTKT01005554.1 |
| gene21871  | -9.26549986  | 3.37456E-09 | CDL15_Pgr025926 | MTKT01004810.1 |
| gene27384  | -9.259126457 | 8.98204E-73 | CDL15_Pgr020606 | MTKT01005809.1 |
| novel.1727 | -9.246950217 | 3.20723E-13 | -               | MTKT01005569.1 |
| novel.562  | -9.233629273 | 3.11272E-13 | -               | MTKT01001935.1 |
| gene671    | -9.208549809 | 7.9047E-13  | CDL15_Pgr023382 | MTKT01000420.1 |
| gene17730  | -9.154415463 | 1.13914E-08 | CDL15_Pgr022254 | MTKT01003937.1 |
| gene6355   | -9.105212999 | 0           | CDL15_Pgr027415 | MTKT01001287.1 |
| gene20618  | -9.03039385  | 4.82148E-67 | CDL15_Pgr011407 | MTKT01004486.1 |
| gene9028   | -9.001599076 | 9.97165E-11 | CDL15_Pgr001579 | MTKT01002011.1 |
| gene22506  | -8.966392683 | 1.35117E-12 | CDL15_Pgr024960 | MTKT01004939.1 |

|            |              |             |                 |                |
|------------|--------------|-------------|-----------------|----------------|
| gene16658  | -8.913341176 | 1.35498E-11 | CDL15_Pgr021240 | MTKT01003414.1 |
| gene26706  | -8.878464517 | 8.0869E-50  | CDL15_Pgr028508 | MTKT01005739.1 |
| gene1186   | -8.851694731 | 7.2481E-157 | CDL15_Pgr014749 | MTKT01000548.1 |
| gene9543   | -8.829362099 | 1.67426E-09 | CDL15_Pgr002094 | MTKT01002011.1 |
| gene29022  | -8.788454123 | 0.002935439 | CDL15_Pgr020179 | MTKT01006319.1 |
| novel.1877 | -8.787580854 | 2.38052E-10 | -               | MTKT01005880.1 |
| gene26112  | -8.696295169 | 2.84919E-08 | CDL15_Pgr017157 | MTKT01005569.1 |
| gene27699  | -8.6335635   | 4.63666E-73 | CDL15_Pgr011527 | MTKT01005817.1 |
| gene19344  | -8.632023656 | 2.59616E-51 | CDL15_Pgr017794 | MTKT01004293.1 |
| gene17247  | -8.601075263 | 2.56218E-10 | CDL15_Pgr003974 | MTKT01003769.1 |
| gene387    | -8.552074605 | 6.3777E-105 | CDL15_Pgr000172 | MTKT01000299.1 |
| gene6627   | -8.507774267 | 2.46649E-07 | CDL15_Pgr027687 | MTKT01001287.1 |
| novel.344  | -8.500357078 | 1.09303E-10 | -               | MTKT01001082.1 |
| novel.1263 | -8.425323399 | 5.21704E-09 | -               | MTKT01004026.1 |
| gene26061  | -8.41308672  | 1.0817E-100 | CDL15_Pgr017106 | MTKT01005569.1 |
| gene3901   | -8.369719615 | 2.07166E-61 | CDL15_Pgr016410 | MTKT01000807.1 |
| gene14323  | -8.33726281  | 3.06913E-09 | CDL15_Pgr017033 | MTKT01002534.1 |
| gene10640  | -8.320677649 | 7.14629E-10 | CDL15_Pgr007481 | MTKT01002214.1 |
| gene7927   | -8.311985135 | 1.24398E-09 | CDL15_Pgr004282 | MTKT01001810.1 |
| gene10091  | -8.283678244 | 1.29779E-23 | CDL15_Pgr006930 | MTKT01002214.1 |
| novel.2046 | -8.282468376 | 2.92594E-08 | -               | MTKT01006319.1 |
| gene21970  | -8.254913131 | 1.4325E-13  | CDL15_Pgr026025 | MTKT01004810.1 |
| gene2874   | -8.239833268 | 8.26547E-07 | CDL15_Pgr020914 | MTKT01000785.1 |
| novel.1855 | -8.224541469 | 2.08995E-06 | -               | MTKT01005815.1 |
| gene1183   | -8.218458976 | 1.94318E-10 | CDL15_Pgr014746 | MTKT01000548.1 |
| novel.1440 | -8.216814565 | 3.48822E-06 | -               | MTKT01004864.1 |
| gene3748   | -8.200601317 | 9.26732E-09 | CDL15_Pgr000384 | MTKT01000801.1 |
| gene11779  | -8.186041509 | 1.36589E-09 | CDL15_Pgr006291 | MTKT01002371.1 |
| gene19618  | -8.174658814 | 2.07452E-10 | CDL15_Pgr018068 | MTKT01004293.1 |
| gene10857  | -8.167185204 | 4.29051E-20 | CDL15_Pgr007698 | MTKT01002214.1 |
| gene14738  | -8.137299773 | 4.76513E-36 | CDL15_Pgr011670 | MTKT01002940.1 |
| gene9027   | -8.085043701 | 1.32123E-07 | CDL15_Pgr001578 | MTKT01002011.1 |
| gene17963  | -8.072840999 | 3.15659E-12 | CDL15_Pgr026517 | MTKT01003950.1 |
| gene28766  | -8.067138746 | 5.60499E-09 | CDL15_Pgr019923 | MTKT01006319.1 |
| gene15354  | -8.052870647 | 1.51122E-93 | CDL15_Pgr028239 | MTKT01003207.1 |
| gene3161   | -8.049677829 | 1.22223E-09 | CDL15_Pgr012673 | MTKT01000791.1 |
| gene9692   | -8.041882545 | 5.81619E-42 | CDL15_Pgr002243 | MTKT01002011.1 |
| gene10450  | -8.033275085 | 4.06611E-07 | CDL15_Pgr007291 | MTKT01002214.1 |
| gene25922  | -7.864990331 | 6.47113E-08 | CDL15_Pgr015441 | MTKT01005556.1 |
| gene2928   | -7.840964649 | 1.29813E-08 | CDL15_Pgr002319 | MTKT01000790.1 |
| gene21113  | -7.802443384 | 1.61263E-55 | CDL15_Pgr014513 | MTKT01004609.1 |
| gene26387  | -7.776597015 | 3.08283E-43 | CDL15_Pgr008873 | MTKT01005615.1 |
| novel.2007 | -7.756331349 | 2.06891E-12 | -               | MTKT01006319.1 |
| gene25180  | -7.738076778 | 1.63537E-14 | CDL15_Pgr013400 | MTKT01005554.1 |

|            |              |             |                 |                |
|------------|--------------|-------------|-----------------|----------------|
| novel.340  | -7.737500419 | 3.33436E-07 | -               | MTKT01001080.1 |
| novel.1955 | -7.651017459 | 3.21734E-08 | -               | MTKT01006319.1 |
| novel.2055 | -7.63729678  | 2.40294E-07 | -               | MTKT01006319.1 |
| gene24508  | -7.578630621 | 9.59401E-37 | CDL15_Pgr000576 | MTKT01005400.1 |
| gene27622  | -7.560356005 | 3.19865E-07 | CDL15_Pgr018846 | MTKT01005815.1 |
| novel.1800 | -7.522590528 | 5.7342E-08  | -               | MTKT01005739.1 |
| gene19440  | -7.500018714 | 3.09019E-49 | CDL15_Pgr017890 | MTKT01004293.1 |
| gene23557  | -7.498221656 | 6.34456E-31 | CDL15_Pgr016291 | MTKT01005171.1 |
| gene10258  | -7.492346959 | 6.5696E-08  | CDL15_Pgr007097 | MTKT01002214.1 |
| novel.754  | -7.487532645 | 1.40649E-10 | -               | MTKT01002214.1 |
| gene2411   | -7.477503888 | 1.37985E-06 | CDL15_Pgr010470 | MTKT01000670.1 |
| gene4783   | -7.452406062 | 4.20914E-05 | CDL15_Pgr015698 | MTKT01001080.1 |
| gene27419  | -7.436017237 | 4.16499E-07 | CDL15_Pgr010131 | MTKT01005811.1 |
| gene1181   | -7.428591009 | 3.2986E-11  | CDL15_Pgr014744 | MTKT01000548.1 |
| gene1940   | -7.421656599 | 3.16877E-47 | CDL15_Pgr024157 | MTKT01000666.1 |
| novel.961  | -7.395011729 | 4.75522E-10 | -               | MTKT01002534.1 |
| gene28003  | -7.36959708  | 5.4932E-06  | CDL15_Pgr006151 | MTKT01005880.1 |
| gene20540  | -7.337872727 | 2.52358E-06 | CDL15_Pgr011329 | MTKT01004486.1 |
| gene17075  | -7.30743713  | 1.3434E-235 | CDL15_Pgr005110 | MTKT01003711.1 |
| gene17426  | -7.30559601  | 3.34075E-06 | CDL15_Pgr008369 | MTKT01003794.1 |
| gene19717  | -7.298542864 | 5.80934E-07 | CDL15_Pgr018167 | MTKT01004293.1 |
| gene3565   | -7.284308952 | 0.000951069 | CDL15_Pgr016609 | MTKT01000799.1 |
| gene2257   | -7.250859446 | 7.93822E-24 | CDL15_Pgr024474 | MTKT01000666.1 |
| gene10623  | -7.24701373  | 6.47522E-42 | CDL15_Pgr007464 | MTKT01002214.1 |
| gene27679  | -7.226654295 | 5.76415E-08 | CDL15_Pgr011507 | MTKT01005817.1 |
| gene24287  | -7.22602831  | 4.97962E-07 | CDL15_Pgr028430 | MTKT01005384.1 |
| gene11707  | -7.220543227 | 2.68973E-37 | CDL15_Pgr010093 | MTKT01002370.1 |
| novel.1312 | -7.211709118 | 4.45914E-07 | -               | MTKT01004293.1 |
| gene10107  | -7.139805605 | 1.83399E-50 | CDL15_Pgr006946 | MTKT01002214.1 |
| gene2314   | -7.13466132  | 2.22027E-47 | CDL15_Pgr024531 | MTKT01000666.1 |
| novel.112  | -7.131903772 | 1.48568E-06 | -               | MTKT01000548.1 |
| gene5059   | -7.117672793 | 4.08924E-28 | CDL15_Pgr015974 | MTKT01001080.1 |
| gene8299   | -7.110577296 | 5.24657E-76 | CDL15_Pgr012840 | MTKT01001932.1 |
| gene23518  | -7.109819934 | 2.43076E-08 | CDL15_Pgr004879 | MTKT01005034.1 |
| gene25114  | -7.061780452 | 2.39927E-18 | CDL15_Pgr010431 | MTKT01005538.1 |
| novel.259  | -7.059065439 | 4.72953E-05 | -               | MTKT01000807.1 |
| gene8298   | -7.057360751 | 5.12291E-70 | CDL15_Pgr012839 | MTKT01001932.1 |
| gene12885  | -7.056381115 | 0.000884903 | CDL15_Pgr003291 | MTKT01002492.1 |
| gene13845  | -7.053825763 | 2.08832E-06 | CDL15_Pgr018641 | MTKT01002507.1 |
| gene26963  | -7.043534873 | 5.18932E-08 | CDL15_Pgr028765 | MTKT01005739.1 |
| gene22109  | -7.019973421 | 3.6744E-30  | CDL15_Pgr013872 | MTKT01004864.1 |
| gene17532  | -7.012216973 | 6.11646E-17 | CDL15_Pgr008475 | MTKT01003794.1 |
| gene4462   | -7.008381237 | 4.87447E-07 | CDL15_Pgr010174 | MTKT01000826.1 |
| gene673    | -6.99805028  | 0.000977741 | CDL15_Pgr023384 | MTKT01000420.1 |



|            |              |             |                 |                |
|------------|--------------|-------------|-----------------|----------------|
| gene11626  | -6.979336963 | 1.15655E-06 | CDL15_Pgr010012 | MTKT01002370.1 |
| gene491    | -6.979066491 | 3.59627E-96 | CDL15_Pgr000276 | MTKT01000299.1 |
| gene704    | -6.973056684 | 1.75874E-05 | CDL15_Pgr019246 | MTKT01000429.1 |
| gene24485  | -6.965570925 | 1.06926E-05 | CDL15_Pgr000553 | MTKT01005400.1 |
| gene20405  | -6.945263344 | 4.86086E-06 | CDL15_Pgr011194 | MTKT01004486.1 |
| gene2064   | -6.889445046 | 2.09956E-17 | CDL15_Pgr024281 | MTKT01000666.1 |
| gene13933  | -6.887294526 | 5.2417E-06  | CDL15_Pgr012406 | MTKT01002520.1 |
| gene22152  | -6.872372655 | 1.08946E-07 | CDL15_Pgr013915 | MTKT01004864.1 |
| gene21619  | -6.858819754 | 1.90413E-06 | CDL15_Pgr025674 | MTKT01004810.1 |
| gene18115  | -6.857973749 | 4.23937E-16 | CDL15_Pgr026669 | MTKT01003950.1 |
| gene2846   | -6.845260806 | 2.29465E-11 | CDL15_Pgr020886 | MTKT01000785.1 |
| novel.876  | -6.839414477 | 3.44922E-06 | -               | MTKT01002492.1 |
| gene8464   | -6.835532889 | 2.85503E-06 | CDL15_Pgr013005 | MTKT01001932.1 |
| gene24509  | -6.786937398 | 1.48856E-06 | CDL15_Pgr000577 | MTKT01005400.1 |
| gene1643   | -6.773493943 | 1.76139E-61 | CDL15_Pgr026945 | MTKT01000605.1 |
| gene4357   | -6.770801093 | 6.86446E-49 | CDL15_Pgr022744 | MTKT01000813.1 |
| gene13950  | -6.770587686 | 2.88764E-17 | CDL15_Pgr012423 | MTKT01002520.1 |
| gene3145   | -6.765822643 | 4.36072E-37 | CDL15_Pgr002536 | MTKT01000790.1 |
| gene18655  | -6.739052063 | 2.40861E-11 | CDL15_Pgr001368 | MTKT01003953.1 |
| gene12182  | -6.720756975 | 3.36036E-06 | CDL15_Pgr023130 | MTKT01002440.1 |
| gene14455  | -6.705227044 | 1.89728E-07 | CDL15_Pgr028893 | MTKT01002590.1 |
| gene18818  | -6.67473528  | 1.7144E-06  | CDL15_Pgr016545 | MTKT01003957.1 |
| gene15929  | -6.672903398 | 0.001516661 | CDL15_Pgr009932 | MTKT01003224.1 |
| gene4343   | -6.660112236 | 3.74818E-14 | CDL15_Pgr022730 | MTKT01000813.1 |
| gene15355  | -6.651550967 | 0.000196325 | CDL15_Pgr028240 | MTKT01003207.1 |
| novel.933  | -6.646702548 | 5.06831E-06 | -               | MTKT01002507.1 |
| novel.1848 | -6.646546547 | 5.23815E-05 | -               | MTKT01005815.1 |
| gene22156  | -6.619190104 | 1.53476E-05 | CDL15_Pgr013919 | MTKT01004864.1 |
| gene16458  | -6.604747232 | 1.0227E-12  | CDL15_Pgr023724 | MTKT01003389.1 |
| gene3747   | -6.596372467 | 8.93169E-05 | CDL15_Pgr000383 | MTKT01000801.1 |
| novel.100  | -6.588401343 | 1.61521E-52 | -               | MTKT01000548.1 |
| gene12984  | -6.571677253 | 1.95514E-96 | CDL15_Pgr003390 | MTKT01002492.1 |
| gene3902   | -6.538194079 | 6.8226E-32  | CDL15_Pgr016411 | MTKT01000807.1 |
| gene11420  | -6.535181655 | 2.18221E-30 | CDL15_Pgr019786 | MTKT01002229.1 |
| gene9132   | -6.434159581 | 5.69969E-06 | CDL15_Pgr001683 | MTKT01002011.1 |
| gene9206   | -6.424090264 | 3.61253E-16 | CDL15_Pgr001757 | MTKT01002011.1 |
| gene3945   | -6.403121671 | 3.00546E-05 | CDL15_Pgr016454 | MTKT01000807.1 |
| gene28357  | -6.38927025  | 1.39012E-50 | CDL15_Pgr022065 | MTKT01006103.1 |
| gene20610  | -6.38528231  | 9.10061E-05 | CDL15_Pgr011399 | MTKT01004486.1 |
| gene12778  | -6.377538684 | 0.001657535 | CDL15_Pgr003184 | MTKT01002492.1 |
| gene4786   | -6.373760069 | 0.006261596 | CDL15_Pgr015701 | MTKT01001080.1 |
| gene28336  | -6.366803892 | 5.66452E-24 | CDL15_Pgr022044 | MTKT01006103.1 |
| gene8613   | -6.363264855 | 1.61281E-06 | CDL15_Pgr011855 | MTKT01001935.1 |
| gene21182  | -6.345861711 | 2.35293E-89 | CDL15_Pgr014582 | MTKT01004609.1 |

|            |              |             |                      |                |
|------------|--------------|-------------|----------------------|----------------|
| novel.374  | -6.331499447 | 5.61505E-05 | -                    | MTKT01001094.1 |
| gene10624  | -6.316931821 | 5.20833E-05 | CDL15_Pgr007465      | MTKT01002214.1 |
| gene19529  | -6.31677419  | 3.60887E-25 | CDL15_Pgr017979      | MTKT01004293.1 |
| gene20678  | -6.311272422 | 3.4115E-183 | CDL15_Pgr011467      | MTKT01004486.1 |
| gene10108  | -6.257874465 | 0.000216636 | CDL15_Pgr006947      | MTKT01002214.1 |
| novel.383  | -6.240946472 | 6.55145E-34 | -                    | MTKT01001111.1 |
| gene4051   | -6.215292195 | 4.69834E-31 | CDL15_Pgr022438      | MTKT01000813.1 |
| gene2209   | -6.21282632  | 1.78756E-06 | CDL15_Pgr024426      | MTKT01000666.1 |
| gene12535  | -6.203377202 | 0.000185487 | CDL15_Pgr002941      | MTKT01002492.1 |
| gene25079  | -6.190259838 | 1.38936E-08 | CDL15_Pgr010396      | MTKT01005538.1 |
| gene20537  | -6.184433555 | 8.2552E-108 | CDL15_Pgr011326      | MTKT01004486.1 |
| gene24675  | -6.18272381  | 7.18994E-08 | CDL15_Pgr000743      | MTKT01005400.1 |
| gene6906   | -6.172830998 | 7.84726E-28 | CDL15_Pgr027966      | MTKT01001287.1 |
| gene1192   | -6.169284037 | 0.000106898 | CDL15_Pgr014755      | MTKT01000548.1 |
| gene6663   | -6.145791734 | 5.49243E-07 | CDL15_Pgr027723      | MTKT01001287.1 |
| gene670    | -6.144880415 | 0.00053724  | CDL15_Pgr023381      | MTKT01000420.1 |
| gene5285   | -6.124004381 | 1.71104E-06 | hypothetical_protein | MTKT01001084.1 |
| gene26115  | -6.114150278 | 3.05625E-14 | CDL15_Pgr017160      | MTKT01005569.1 |
| gene13032  | -6.107759919 | 2.2335E-67  | CDL15_Pgr003438      | MTKT01002492.1 |
| gene28198  | -6.101846965 | 1.35813E-83 | CDL15_Pgr019459      | MTKT01005965.1 |
| gene1900   | -6.089326076 | 1.72748E-32 | CDL15_Pgr024117      | MTKT01000666.1 |
| gene1729   | -6.085740496 | 0.000133184 | CDL15_Pgr012562      | MTKT01000661.1 |
| gene1964   | -6.085638385 | 0.000267743 | CDL15_Pgr024181      | MTKT01000666.1 |
| gene23424  | -6.062506743 | 1.71249E-08 | CDL15_Pgr004785      | MTKT01005034.1 |
| gene14160  | -6.059183415 | 0.000115822 | CDL15_Pgr016870      | MTKT01002534.1 |
| gene9966   | -6.058226648 | 2.86148E-26 | CDL15_Pgr006805      | MTKT01002214.1 |
| gene10315  | -6.057555976 | 7.60615E-10 | CDL15_Pgr007154      | MTKT01002214.1 |
| gene4363   | -6.032307136 | 0.000108196 | CDL15_Pgr022750      | MTKT01000813.1 |
| gene6981   | -6.019362983 | 0.000626557 | CDL15_Pgr028041      | MTKT01001287.1 |
| gene10737  | -6.019289202 | 1.68569E-11 | CDL15_Pgr007578      | MTKT01002214.1 |
| gene24118  | -6.016758867 | 0.001474829 | CDL15_Pgr024711      | MTKT01005379.1 |
| gene18204  | -5.994822791 | 0.000407118 | hypothetical_protein | MTKT01003950.1 |
| novel.1498 | -5.992458275 | 0.000153795 | -                    | MTKT01004950.1 |
| gene2788   | -5.984052687 | 0.000911888 | CDL15_Pgr020828      | MTKT01000785.1 |
| gene27395  | -5.961750921 | 0.005648311 | CDL15_Pgr020617      | MTKT01005809.1 |
| gene9701   | -5.956610562 | 0.001006367 | CDL15_Pgr002252      | MTKT01002011.1 |
| gene24714  | -5.949990314 | 0.000181495 | CDL15_Pgr000782      | MTKT01005400.1 |
| novel.887  | -5.947640416 | 1.42696E-21 | -                    | MTKT01002492.1 |
| gene16163  | -5.937530453 | 2.91554E-74 | CDL15_Pgr021740      | MTKT01003240.1 |
| gene10203  | -5.935718647 | 5.90857E-07 | CDL15_Pgr007042      | MTKT01002214.1 |
| novel.173  | -5.934368035 | 0.003868674 | -                    | MTKT01000670.1 |
| novel.350  | -5.93219255  | 6.07227E-05 | -                    | MTKT01001084.1 |
| gene17236  | -5.896350059 | 8.52997E-28 | CDL15_Pgr003963      | MTKT01003769.1 |
| gene20541  | -5.886856237 | 5.21822E-05 | CDL15_Pgr011330      | MTKT01004486.1 |

|            |              |             |                 |                |
|------------|--------------|-------------|-----------------|----------------|
| gene17994  | -5.886735723 | 6.61117E-16 | CDL15_Pgr026548 | MTKT01003950.1 |
| gene18692  | -5.88568338  | 3.91499E-08 | CDL15_Pgr001405 | MTKT01003953.1 |
| gene12463  | -5.881624142 | 0.000266991 | CDL15_Pgr002869 | MTKT01002492.1 |
| gene513    | -5.861668462 | 9.24798E-13 | CDL15_Pgr000298 | MTKT01000299.1 |
| novel.1397 | -5.851648159 | 7.16978E-10 | -               | MTKT01004693.1 |
| gene19655  | -5.8296064   | 0.001020648 | CDL15_Pgr018105 | MTKT01004293.1 |
| novel.637  | -5.825682127 | 0.00038867  | -               | MTKT01001946.1 |
| gene6777   | -5.800156692 | 4.83268E-05 | CDL15_Pgr027837 | MTKT01001287.1 |
| gene19810  | -5.79405932  | 1.6918E-254 | CDL15_Pgr018260 | MTKT01004293.1 |
| gene23844  | -5.791319391 | 0.000497511 | CDL15_Pgr010761 | MTKT01005370.1 |
| gene12094  | -5.770899264 | 2.14401E-81 | CDL15_Pgr023042 | MTKT01002440.1 |
| gene12236  | -5.765544361 | 0.000741351 | CDL15_Pgr023184 | MTKT01002440.1 |
| gene7102   | -5.757363691 | 0.002367808 | CDL15_Pgr014176 | MTKT01001322.1 |
| gene12189  | -5.754209294 | 4.85915E-66 | CDL15_Pgr023137 | MTKT01002440.1 |
| gene16870  | -5.752316813 | 3.51237E-34 | CDL15_Pgr004532 | MTKT01003433.1 |
| gene8474   | -5.738503887 | 0.000853257 | CDL15_Pgr013015 | MTKT01001932.1 |
| gene17544  | -5.736629951 | 7.18845E-05 | CDL15_Pgr008487 | MTKT01003794.1 |
| gene22012  | -5.729004887 | 0.009577073 | CDL15_Pgr026067 | MTKT01004810.1 |
| gene16821  | -5.723689926 | 0.000557857 | CDL15_Pgr021403 | MTKT01003414.1 |
| gene6524   | -5.699036395 | 2.04358E-16 | CDL15_Pgr027584 | MTKT01001287.1 |
| novel.1081 | -5.689120663 | 6.96959E-15 | -               | MTKT01003224.1 |
| gene11279  | -5.683237657 | 5.96858E-10 | CDL15_Pgr019645 | MTKT01002229.1 |
| gene1963   | -5.68143564  | 0.003514556 | CDL15_Pgr024180 | MTKT01000666.1 |
| novel.1159 | -5.664609418 | 2.49669E-09 | -               | MTKT01003711.1 |
| gene22817  | -5.657771481 | 0.005722971 | CDL15_Pgr025271 | MTKT01004939.1 |
| gene11328  | -5.647221946 | 2.3643E-19  | CDL15_Pgr019694 | MTKT01002229.1 |
| gene26892  | -5.644613102 | 0.000702467 | CDL15_Pgr028694 | MTKT01005739.1 |
| gene10697  | -5.637878486 | 1.32435E-11 | CDL15_Pgr007538 | MTKT01002214.1 |
| gene6545   | -5.620405523 | 0.001325075 | CDL15_Pgr027605 | MTKT01001287.1 |
| gene22081  | -5.617665178 | 0.003834417 | CDL15_Pgr026136 | MTKT01004810.1 |
| gene21479  | -5.609568696 | 5.80641E-06 | CDL15_Pgr025534 | MTKT01004810.1 |
| gene16162  | -5.607558305 | 0.00205604  | CDL15_Pgr021739 | MTKT01003240.1 |
| gene27820  | -5.598642475 | 0.00740419  | CDL15_Pgr024771 | MTKT01005852.1 |
| gene5573   | -5.59359581  | 1.55318E-21 | CDL15_Pgr011093 | MTKT01001090.1 |
| gene8478   | -5.567156505 | 0.008400205 | CDL15_Pgr013019 | MTKT01001932.1 |
| gene21966  | -5.563542691 | 4.06809E-41 | CDL15_Pgr026021 | MTKT01004810.1 |
| gene15457  | -5.521780616 | 1.69531E-50 | CDL15_Pgr009460 | MTKT01003224.1 |
| gene10881  | -5.502761479 | 0.00033961  | CDL15_Pgr007722 | MTKT01002214.1 |
| gene10313  | -5.49867036  | 0.000571721 | CDL15_Pgr007152 | MTKT01002214.1 |
| gene7410   | -5.494520733 | 5.49673E-05 | CDL15_Pgr027112 | MTKT01001633.1 |
| gene18206  | -5.491950196 | 0.004285678 | CDL15_Pgr026760 | MTKT01003950.1 |
| gene14189  | -5.487837936 | 7.13018E-10 | CDL15_Pgr016899 | MTKT01002534.1 |
| novel.1612 | -5.487385182 | 0.002305891 | -               | MTKT01005400.1 |
| gene2682   | -5.48285046  | 4.39716E-49 | CDL15_Pgr024010 | MTKT01000773.1 |

|            |              |             |                 |                |
|------------|--------------|-------------|-----------------|----------------|
| gene24900  | -5.48026296  | 1.48479E-31 | CDL15_Pgr002638 | MTKT01005527.1 |
| gene18726  | -5.471561013 | 0.000145298 | CDL15_Pgr001439 | MTKT01003953.1 |
| gene19522  | -5.470595117 | 0.000125231 | CDL15_Pgr017972 | MTKT01004293.1 |
| gene6056   | -5.467953514 | 0.002259206 | CDL15_Pgr029086 | MTKT01001158.1 |
| gene1422   | -5.463250263 | 0.005048597 | CDL15_Pgr006439 | MTKT01000553.1 |
| gene25769  | -5.454008516 | 1.07827E-13 | CDL15_Pgr015288 | MTKT01005556.1 |
| gene2326   | -5.451563069 | 0.00192074  | CDL15_Pgr024543 | MTKT01000666.1 |
| gene25286  | -5.4409595   | 2.53731E-78 | CDL15_Pgr013506 | MTKT01005554.1 |
| gene16277  | -5.439809074 | 5.99954E-13 | CDL15_Pgr021854 | MTKT01003240.1 |
| gene9967   | -5.436819425 | 0.005121595 | CDL15_Pgr006806 | MTKT01002214.1 |
| gene4035   | -5.434626726 | 0.000620371 | CDL15_Pgr022420 | MTKT01000813.1 |
| gene15508  | -5.428590802 | 0.006257348 | CDL15_Pgr009511 | MTKT01003224.1 |
| gene21546  | -5.396964062 | 2.69124E-24 | CDL15_Pgr025601 | MTKT01004810.1 |
| gene27556  | -5.390105449 | 4.12853E-35 | CDL15_Pgr018780 | MTKT01005815.1 |
| gene18506  | -5.381163048 | 2.44155E-33 | CDL15_Pgr001219 | MTKT01003953.1 |
| gene23412  | -5.364025401 | 0.004609298 | CDL15_Pgr004773 | MTKT01005034.1 |
| gene22681  | -5.358130141 | 2.1972E-40  | CDL15_Pgr025135 | MTKT01004939.1 |
| gene11595  | -5.341372298 | 6.14371E-18 | CDL15_Pgr009981 | MTKT01002370.1 |
| gene10725  | -5.338650223 | 3.58546E-10 | CDL15_Pgr007566 | MTKT01002214.1 |
| novel.1433 | -5.331362744 | 0.000527205 | -               | MTKT01004810.1 |
| gene19574  | -5.329427692 | 7.91381E-09 | CDL15_Pgr018024 | MTKT01004293.1 |
| gene26910  | -5.316024222 | 1.21566E-28 | CDL15_Pgr028712 | MTKT01005739.1 |
| gene24109  | -5.308861189 | 9.85999E-22 | CDL15_Pgr024702 | MTKT01005379.1 |
| gene4118   | -5.30127967  | 8.47837E-19 | CDL15_Pgr022505 | MTKT01000813.1 |
| gene13150  | -5.296917882 | 0.000101706 | CDL15_Pgr003556 | MTKT01002492.1 |
| gene10138  | -5.289874292 | 1.14936E-28 | CDL15_Pgr006977 | MTKT01002214.1 |
| gene19718  | -5.289705563 | 5.3488E-130 | CDL15_Pgr018168 | MTKT01004293.1 |
| gene20329  | -5.289176409 | 9.09926E-60 | CDL15_Pgr005940 | MTKT01004399.1 |
| gene25101  | -5.275258277 | 0.000800454 | CDL15_Pgr010418 | MTKT01005538.1 |
| gene22979  | -5.268092184 | 0.007324403 | CDL15_Pgr025433 | MTKT01004939.1 |
| gene15469  | -5.264294096 | 0.002926177 | CDL15_Pgr009472 | MTKT01003224.1 |
| novel.1546 | -5.255884038 | 0.00052372  | -               | MTKT01005370.1 |
| gene9134   | -5.251399345 | 1.9727E-120 | CDL15_Pgr001685 | MTKT01002011.1 |
| gene4355   | -5.249643935 | 1.71514E-56 | CDL15_Pgr022742 | MTKT01000813.1 |
| gene27747  | -5.24589809  | 6.55169E-18 | CDL15_Pgr006396 | MTKT01005821.1 |
| gene18414  | -5.22889205  | 4.07705E-07 | CDL15_Pgr001127 | MTKT01003953.1 |
| gene11697  | -5.224419769 | 1.22847E-07 | CDL15_Pgr010083 | MTKT01002370.1 |
| novel.1852 | -5.20980133  | 0.005948474 | -               | MTKT01005815.1 |
| novel.645  | -5.200340777 | 5.4339E-25  | -               | MTKT01002011.1 |
| gene23883  | -5.192326414 | 0.004824871 | CDL15_Pgr010800 | MTKT01005370.1 |
| novel.175  | -5.187677377 | 0.004228289 | -               | MTKT01000670.1 |
| gene27417  | -5.185263455 | 0.004814282 | CDL15_Pgr010129 | MTKT01005811.1 |
| gene18197  | -5.17154416  | 1.446E-06   | CDL15_Pgr026751 | MTKT01003950.1 |
| gene6107   | -5.167891299 | 1.15752E-14 | CDL15_Pgr029137 | MTKT01001158.1 |

|           |              |             |                      |                |
|-----------|--------------|-------------|----------------------|----------------|
| gene2799  | -5.161420976 | 0.000431096 | CDL15_Pgr020839      | MTKT01000785.1 |
| gene5931  | -5.145316463 | 0.00276368  | CDL15_Pgr023696      | MTKT01001132.1 |
| gene8369  | -5.144023941 | 0.000380924 | CDL15_Pgr012910      | MTKT01001932.1 |
| gene3329  | -5.143476224 | 1.6113E-109 | CDL15_Pgr003694      | MTKT01000797.1 |
| gene27680 | -5.142880601 | 1.12212E-14 | CDL15_Pgr011508      | MTKT01005817.1 |
| gene1911  | -5.14015177  | 2.08948E-42 | CDL15_Pgr024128      | MTKT01000666.1 |
| gene25774 | -5.139728847 | 2.09152E-06 | CDL15_Pgr015293      | MTKT01005556.1 |
| gene12316 | -5.139044521 | 1.07656E-46 | hypothetical_protein | MTKT01002440.1 |
| gene7630  | -5.134294528 | 5.3594E-255 | CDL15_Pgr009355      | MTKT01001802.1 |
| gene4686  | -5.117166633 | 5.73682E-20 | CDL15_Pgr015601      | MTKT01001080.1 |
| gene27455 | -5.11676308  | 7.1466E-24  | CDL15_Pgr018679      | MTKT01005815.1 |
| gene29218 | -5.113980479 | 3.8236E-53  | hypothetical_protein | MTKT01017349.1 |
| gene28148 | -5.112665805 | 0.004958286 | CDL15_Pgr008232      | MTKT01005898.1 |
| gene13035 | -5.106431974 | 0.002911756 | CDL15_Pgr003441      | MTKT01002492.1 |
| gene24877 | -5.100557235 | 0.005885281 | CDL15_Pgr002615      | MTKT01005527.1 |
| gene26125 | -5.099309097 | 0.005694473 | CDL15_Pgr017170      | MTKT01005569.1 |
| gene2347  | -5.086066883 | 1.30624E-43 | hypothetical_protein | MTKT01000666.1 |
| gene18092 | -5.073003372 | 1.61553E-15 | CDL15_Pgr026646      | MTKT01003950.1 |
| gene26609 | -5.059167201 | 1.99021E-18 | CDL15_Pgr009095      | MTKT01005615.1 |
| gene20085 | -5.054714729 | 4.84375E-76 | CDL15_Pgr005696      | MTKT01004399.1 |
| gene4161  | -5.054218539 | 2.52063E-08 | CDL15_Pgr022548      | MTKT01000813.1 |
| gene21179 | -5.044719324 | 0.003077871 | CDL15_Pgr014579      | MTKT01004609.1 |
| gene3542  | -5.040649969 | 8.50204E-98 | CDL15_Pgr016586      | MTKT01000799.1 |
| gene1465  | -5.034657352 | 0.000204167 | CDL15_Pgr006482      | MTKT01000553.1 |
| gene6416  | -5.03361535  | 0.007551529 | CDL15_Pgr027476      | MTKT01001287.1 |
| gene5187  | -5.028475797 | 0.009251609 | CDL15_Pgr026380      | MTKT01001082.1 |
| gene14388 | -5.027000291 | 0.001947407 | CDL15_Pgr028826      | MTKT01002590.1 |
| gene24026 | -5.022162807 | 2.4378E-48  | CDL15_Pgr019204      | MTKT01005376.1 |
| gene5496  | -5.021568208 | 1.2133E-05  | CDL15_Pgr011016      | MTKT01001090.1 |
| gene273   | -5.020818738 | 0.006996577 | CDL15_Pgr017404      | MTKT01000281.1 |
| gene15781 | -5.020148776 | 1.48783E-49 | CDL15_Pgr009784      | MTKT01003224.1 |
| gene21467 | -5.007601725 | 0.009528137 | CDL15_Pgr025522      | MTKT01004810.1 |
